# Supplementary material for: Social Media and Oral Hygiene Awareness in Saudi Arabia: A Cross-Sectional Study
Source: Research Square preprint supplement (doi:10.21203/rs.3.rs-7055199/v1), 2025-08-07
Supplement: Supplementary file 1 [file 73cf1c2275971b28fa2f0610.docx]

**Social Media and Oral Hygiene Awareness in Saudi Arabia**

1. Which category below best describes your age?

17 or younger

18-20

21-29

30-39

40-49

50-59

60 or older

2. What is your gender?

Female

Male

3. What is the highest level of school you have completed or the highest degree you have received?

Less than high school degree

High school degree

Some college but no degree

Bechler degree

Graduate degree

4. What province do you reside in?

Central

Northern

Southern

Eastern

Western

5. How much social media access do you have?

Unlimited access

Limited access

No access

Unknown

6. Which of the following social media platforms do you use? (Order from 1: most common to 9: least common)

Snapchat

Facebook

Twitter

LinkedIn

YouTube

WhatsApp

Instagram

TikTok

Other

If other specify

…………………………………………………………………………………..

7. How much time do you usually spend using social media networks on a daily basis?

Less than 1 hour

Between 1-3 hours

Between 4-7 hours

More than 7 hours

8. What are the reasons for using social media networks?

(Order from 1: most important reason to 5: least important reasons)

Professionally

Networking

self-promotion

Recreation

Employment opportunities

9. How often do you search for oral health (including oral hygiene or dental care) related information on social media?

Never

Daily

Weekly

Monthly

Yearly

9.1. Which platform do you use for searching for oral health information?

Snapchat

YouTube

Twitter

TikTok

Instagram

Google

Facebook

Other

If others specify

…………………………………………………………………

10. When searching for dental information, who do you look up, (multiple answers) .

Saudi governmental accounts: Ministry of Health

International organizations: Saudi Dental Society.

A dentist's social media account

An influencer or celebrity.

11. Which of the following factors would help you decide which account to trust (multiple answers)

Qualifications

Number of followers

Positive reviews.

Photos of treated cases.

Medical websites or forums

12. How often do you search for dental related information on social media?

Never

Daily

Weekly

Monthly

Yearly

13. Have you ever receive health promotion and oral health education on social media?

Yes

No

I don’t know

13.1. If yes, answer the following question: How much benefit do you get from social media accounts related to Oral health?

No benefit

A little benefit

Moderate benefit

Very beneficial

14. Cavities in baby teeth don't require treatment

True

False

15. My teeth don't hurt, so I don't need to visit the dentist.

True

False

16. Once a cavity is restored, I don't need to worry about it

True

False

17. Sugary sodas and sweets are the only foods that cause cavities.

True

False

18. Which of the following is a risk factor that can lead to dental caries: (multiple answers)

Poor Hygiene habits.

Poor Dietary habits.

Smoking habits.

Presence of Systemic disease

19. How often do you brush your teeth?

Once daily

Twice a day

More than twice daily

Once a week

Several times a week (2-3 times).

Do not brush

19.1. Which items below do you use to clean your teeth? (multiple answers)

Toothbrush.

Toothpaste

Floss

Mouthwash

Interdental brush.

Dental waterjet

Miswak.

20. How often do you change your toothbrush?

Every month

Every 3-5 months

When the bristles loose alignment

21. Do you think oral health has any role in overall health?

Yes

No

Don’t know

Never heard of this

22. Do you go for regular dental appointments? (every 6 months)

Yes

No

23. If you don't have regular dental appointments, what is the most applicable reason?

Fear

Cost

Lack of time

Appointments are not important

24. Do you experience bleeding gums while brushing? (Removed or flossing)

Naver

Sometimes

Very often
